# Supplementary material for: Transferrin-coated magnetic upconversion nanoparticles for efficient photodynamic therapy with near-infrared irradiation and luminescence bioimaging
Source: Royal Society of Chemistry journal article supplement (doi:10.1039/c7nr03019c), 2017-01-01
Supplement: c7nr03019c1.pdf [file c7nr03019c1.pdf]

## Supplementary information

# Transferrin-coated magnetic upconversion nanoparticles for efficient photodynamic therapy with near-infrared irradiation and luminescence bioimaging

Dan Wang,<sup>a,c</sup> Lin Zhu,<sup>b</sup> Yuan Pu,<sup>\*a,d</sup> Jie-Xin Wang,<sup>a,d</sup> Jian-Feng Chen,<sup>a,d</sup> and Liming Dai<sup>\*c</sup>

<sup>a</sup> Beijing Advanced Innovation Center for Soft Matter Science and Engineering, State Key Laboratory of Organic-Inorganic Composites, Beijing University of Chemical Technology, Beijing 100029, China.

<sup>b</sup> Institute of Advanced Materials for Nano-bio Applications, School of Ophthalmology and Optometry, Wenzhou Medical University, 270 Xueyuan Xi Road, Wenzhou, Zhejiang, China.

<sup>c</sup> Center of Advanced Science and Engineering for Carbon (Case4Carbon), Department of Macromolecular Science and Engineering, Case Western Reserve University, Cleveland, OH 44106, USA.

<sup>d</sup> Research Center of the Ministry of Education for High Gravity Engineering and Technology, Beijing University of Chemical Technology, Beijing 100029, China

\*Correspondence should be addressed to Y. Pu ([puyuan@mail.buct.edu.cn](mailto:puyuan@mail.buct.edu.cn)), and L. Dai. ([liming.dai@case.edu](mailto:liming.dai@case.edu)).

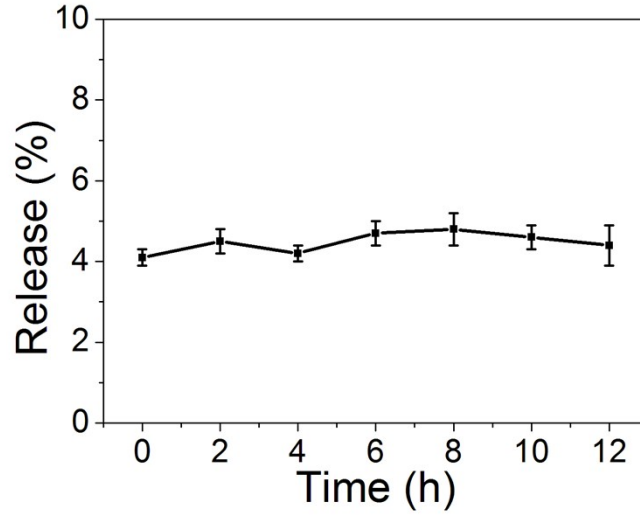

**Figure S1.** Release kinetics of UCNP@TRF-PpIX nanoparticles in 1% Tween-20 suspension at 37 °C.

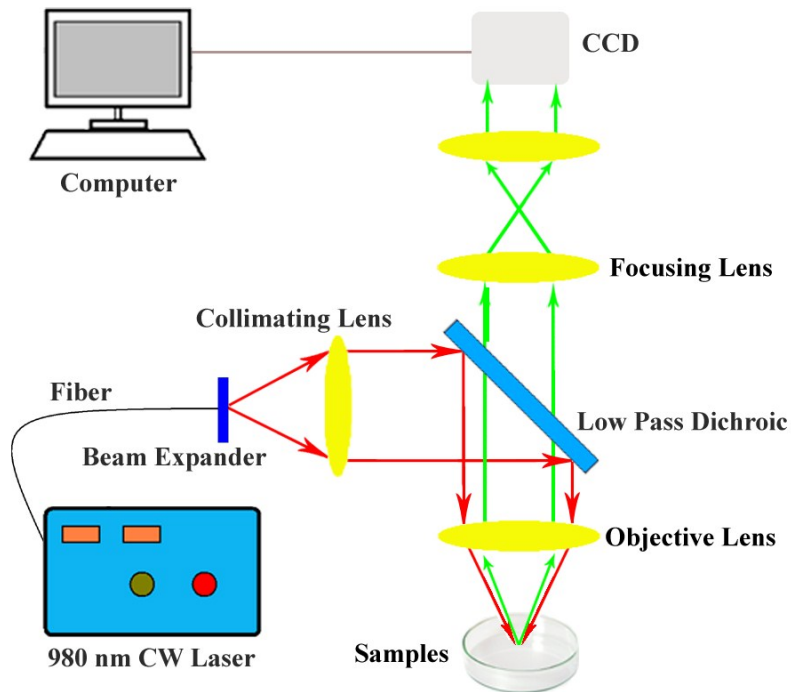

**Figure S2.** Upconversion luminescence imaging system.

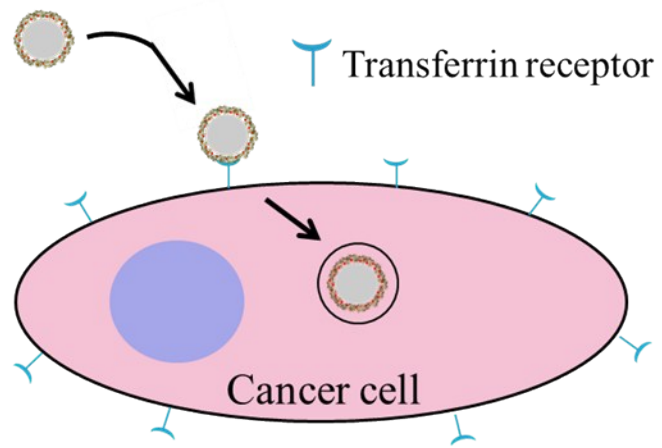

**Figure S3.** A schematic illustration of cellular uptake of the UCNP@TRF nanoparticles.
